# Supplementary material
Source: bioRxiv or medRxiv preprint supplement (https://www.biorxiv.org/highwire/filestream/89746/field_highwire_adjunct_files/0/232454-1.pdf)
Supplement: Supplementary file [file 232454-1.pdf]

Supplemental Material: Estimating the  
functional dimensionality of neural  
representations

# 1 Identifying areas carrying functional dimensionality

With the first dataset from a category learning study by Mack et al. (2013), we aimed to identify areas carrying functional dimensionality and compare them with the areas found by the original authors' model-based analysis.

## 1.1 Methods

Pre-processing of the data was carried out using SPM12 (Penny et al., 2006). Functional EPI data were motion-corrected with respect to the mean-image, T1 weighted anatomical scans were realigned to the EPI images, and both functional and anatomical images were normalized to MNI space with a voxel-resolution of  $3 \times 3 \times 3$ . Data were high-pass filtered at 128Hz to account for slow signal drifts. Beta estimates were derived from a GLM containing one regressor per stimulus (16 regressors in total), convolved with the HRF. Motion regressors were included in the GLM as covariates of no interest. Temporal autocorrelations were accounted for by implementing an autoregressive model (AR-1) during parameter estimation. Residuals of the GLM for each timestep were saved and used later on for pre-whitening of the data.

# 2 Using functional dimensionality to assess sensitivity to stimulus features

Using data from a study of real-world categories using photographic stimuli by Bracci and Op de Beeck (2016), we tested whether different regions show functional dimensionality in response to different stimulus features, depending on how the stimulus-space is summarized.

## 2.1 Methods

During the experiment of the second dataset, participants performed a 1-back real-world size judgment task. Each participant completed two sessions (on two different days) of eight runs. For one participant, four runs were lost. Each image was presented twice per run.

Pre-processing of the data was carried out using SPM12. Functional EPI data were motion-corrected with respect to the mean-image, T1 weighted anatomical scans were realigned to EPI images, and both functional and anatomical images were normalized to MNI space with a voxel-resolution of  $3 \times 3 \times 3$ . Data were high-pass filtered at 128Hz to account for slow signal drifts. We aimed to test if our method could be applied to assessing qualitative coding differences across the brain by varying how the stimulus space is summarized. In line with the authors original analysis, we tested for differences depending on whether the stimuli were averaged to emphasize their category or shape information. To that end, we constructed two separate GLMs. The first GLM (catGLM) was composed of one regressor per category (six in total), thus averaging across objects shapes. The second GLM (shapeGLM) consisted of nine different regressors, one for each shape, averaging neural responses across object categories. In both GLMs, regressors were convolved with the HRF and six motion-regressors as covariates of no interest were included.

Dimensionality was estimated separately for both GLMs. We ran a whole-brain searchlight with a 7mm sphere on the beta estimates of the respective GLM, again pre-whitening and mean-centering voxel patterns within each searchlight before estimating the dimensionality. Reconstruction correlations were averaged across runs for each participant and tested for significance across participants using FSL’s randomise function (Winkler et al., 2014). Results were FWE corrected using a TFCE threshold of  $p < .05$ .

### **3 Measuring task-dependent differences in dimensionality**

In this third dataset, we considered whether the underlying dimensionality of neural representations changes as a function of task. In Mack et al. (2016), participants learned a categorization rule over a common stimulus set that either depended on one or two stimulus dimensions. We predicted that the estimated functional dimensionality, as measured by our hierarchical Bayesian method, should be higher for the more complex categorization problem, extending the original authors’ findings.

### 3.1 Methods

Each participant completed twelve functional runs in total, of which four were on type I problem and four on type II problem (the first four runs served as familiarization with the stimuli).

Pre-processing of the data was carried out using SPM12 (Penny et al., 2006). Functional EPI data were motion-corrected with respect to the mean-image, T1 weighted anatomical scans were realigned to EPI images, and both functional and anatomical images were normalized to MNI space with a voxel-resolution of  $3 \times 3 \times 3$ . Data were high-pass filtered at 128Hz to account for slow signal drifts. Beta estimates were derived from a GLM containing one regressor per stimulus (8 regressors in total), convolved with the HRF. Six motion regressors were included in the GLM as covariates of no interest. Temporal autocorrelations were accounted for by implementing an autoregressive model during parameter estimation. Residuals of the GLM for each timestep were saved and used later on for pre-whitening of the data.

We defined a region of interest (ROI) in the left and right LOC based on voxels that showed increased activation with trial onset, based on a separate GLM with only a single regressor modeling all trials ( $p < .001$ , uncorrected; left LOC: 120 voxels, right LOC: 220 voxels). Using an ROI instead of a searchlight approach allowed us to estimate the degree of functional dimensionality rather than only identifying which areas showed functional dimensionality. We estimated dimensionality across these two ROIs separately for the two different categorization tasks. To reduce the impact of category-learning on the estimated dimensionality, the first functional run of each problem type was excluded from the analysis, resulting in three runs for each problem.

## References

- Bracci, S. and Op de Beeck, H. (2016). Dissociations and associations between shape and category representations in the two visual pathways. *Journal of Neuroscience*, 36(2):432–444.
- Mack, M. L., Love, B. C., and Preston, A. R. (2016). Dynamic updating of hippocampal object representations reflects new conceptual knowledge. *Proceedings of the National Academy of Sciences of the United States of America*, 113(46):13203–13208.
- Mack, M. L., Preston, A. R., and Love, B. C. (2013). Decoding the brain’s algorithm for categorization from its neural implementation. *Current Biology*, 23(20):2023–2027.
- Penny, W., Friston, K., Ashburner, J., Kiebel, S., and Nichols, T. (2006). *Statistical Parametric Mapping: The Analysis of Functional Brain Images: The Analysis of Functional Brain Images*, volume 8. Academic press.
- Winkler, A. M., Ridgway, G. R., Webster, M. A., Smith, S. M., and Nichols, T. E. (2014). Permutation inference for the general linear model. *NeuroImage*, 92:381–397.
